# Supplementary material
Source: PubMed Central journal article supplement (PMC10286806)
Supplement: NIHMS1895402-supplement-Snell_et_al-_Tables.pdf [file NIHMS1895402-supplement-Snell_et_al-_Tables.pdf]

**Table S1 (Related to Figure 1 - 4). CyTOF antibodies.**

Antibodies that were purchased directly conjugated are labeled with (d). Other antibodies were conjugated with Fluidigm's Maxpar conjugation kit according to manufacturer's instructions.

| Antibody Specificity | Metal Tag | Clone        | Manufacturer  |
|----------------------|-----------|--------------|---------------|
| Ly6c                 | 115 Ln    | HK14         | BioLegend     |
| CD44                 | 141 Pr    | IM7          | BioLegend     |
| CXCR5                | 142 Nd    | 145502       | BioLegend     |
| CD45.2               | 143 Nd    | 104          | BioLegend     |
| GzmB                 | 144 Nd    | GB11         | Thermofischer |
| CTLA4                | 145 Nd    | UC10-4B9     | BioLegend     |
| Eomes                | 146 Nd    | Dan11mag     | eBioscience   |
| Thy1.1               | 147 Sm    | HIS51        | eBioscience   |
| ICOS                 | 148 Nd    | C398.4A      | Fluidigm (d)  |
| CD69                 | 149 Sm    | H1.273       | BioLegend     |
| CD25                 | 151 Eu    | 3C7          | Fluidigm (d)  |
| CD86                 | 152 Sm    | GL-1         | Biolegend     |
| CD8a                 | 153 Eu    | 536.7        | Fluidigm (d)  |
| CD45.1               | 154 Sm    | A20          | Biolegend     |
| CD103                | 155 Gd    | M290         | BD Bioscience |
| CD27                 | 156 Gd    | LG.3A10      | Biolegend     |
| CD39                 | 159 Tb    | 24DMS1       | eBioscience   |
| CD4                  | 160 Gd    | rm4-5        | BioLegend     |
| Tbet                 | 161 Dy    | 4B10         | Fluidigm (d)  |
| Foxp3                | 162 Dy    | MF-14        | BioLegend     |
| Tim3                 | 163 Dy    | 215008       | R & D Systems |
| CX3CR1               | 164 Dy    | SA011F11     | Fluidigm (d)  |
| TCR $\beta$          | 165 Ho    | 109202       | BioLegend     |
| TCF1                 | 167 Er    | S33-966      | BD Bioscience |
| Bcl6                 | 168 Er    | K112.91      | BD Bioscience |
| SLAMF1               | 169 Tm    | TC15-12F12.2 | BioLegend     |
| Nk1.1                | 170 Er    | PK136        | Fluidigm (d)  |
| CD80                 | 171 Yb    | 16-10A1      | Fluidigm (d)  |
| Ki67                 | 172 Yb    | B56          | BD Bioscience |
| Helios               | 173 Yb    | 22F6         | Biolegend     |
| CD127                | 174 Yb    | A7R34        | Biolegend     |

|        |        |        |                |
|--------|--------|--------|----------------|
| PD1    | 175 Lu | RMP-30 | BioLegend      |
| Thy1.2 | 176 Yb | 53-21  | Thermo Fischer |
| Lag3   | 209 Bi | C9B7W  | Biolegend      |

**Table S2 (Related to Figure 1 - 2). Markers Used to Cluster SMARTA CD4 T cells**

|          |
|----------|
| Antibody |
| Ly6c     |
| CD44     |
| CXCR5    |
| GzmB     |
| Eomes    |
| CD69     |
| CD86     |
| CD39     |
| Tbet     |
| Tim3     |
| CX3CR1   |
| TCF1     |
| Bcl6     |
| SLAMF1   |
| CD80     |
| Helios   |
| CD127    |
| PD1      |
| Lag3     |

**Table S3 (Related to Figure 3). Markers Used to Cluster Regulatory T cells**

|          |
|----------|
| Antibody |
| Ly6c     |
| CD44     |
| CXCR5    |
| CTLA4    |
| Eomes    |
| CD69     |
| CD25     |
| CD86     |
| CD103    |
| CD39     |
| Tbet     |
| Foxp3    |
| Tim3     |
| TCF1     |
| Bcl6     |
| SLAMF1   |
| CD80     |
| Helios   |
| CD127    |
| PD1      |
| Lag3     |
