# Supplementary material
Source: PubMed Central journal article supplement (PMC10286806)

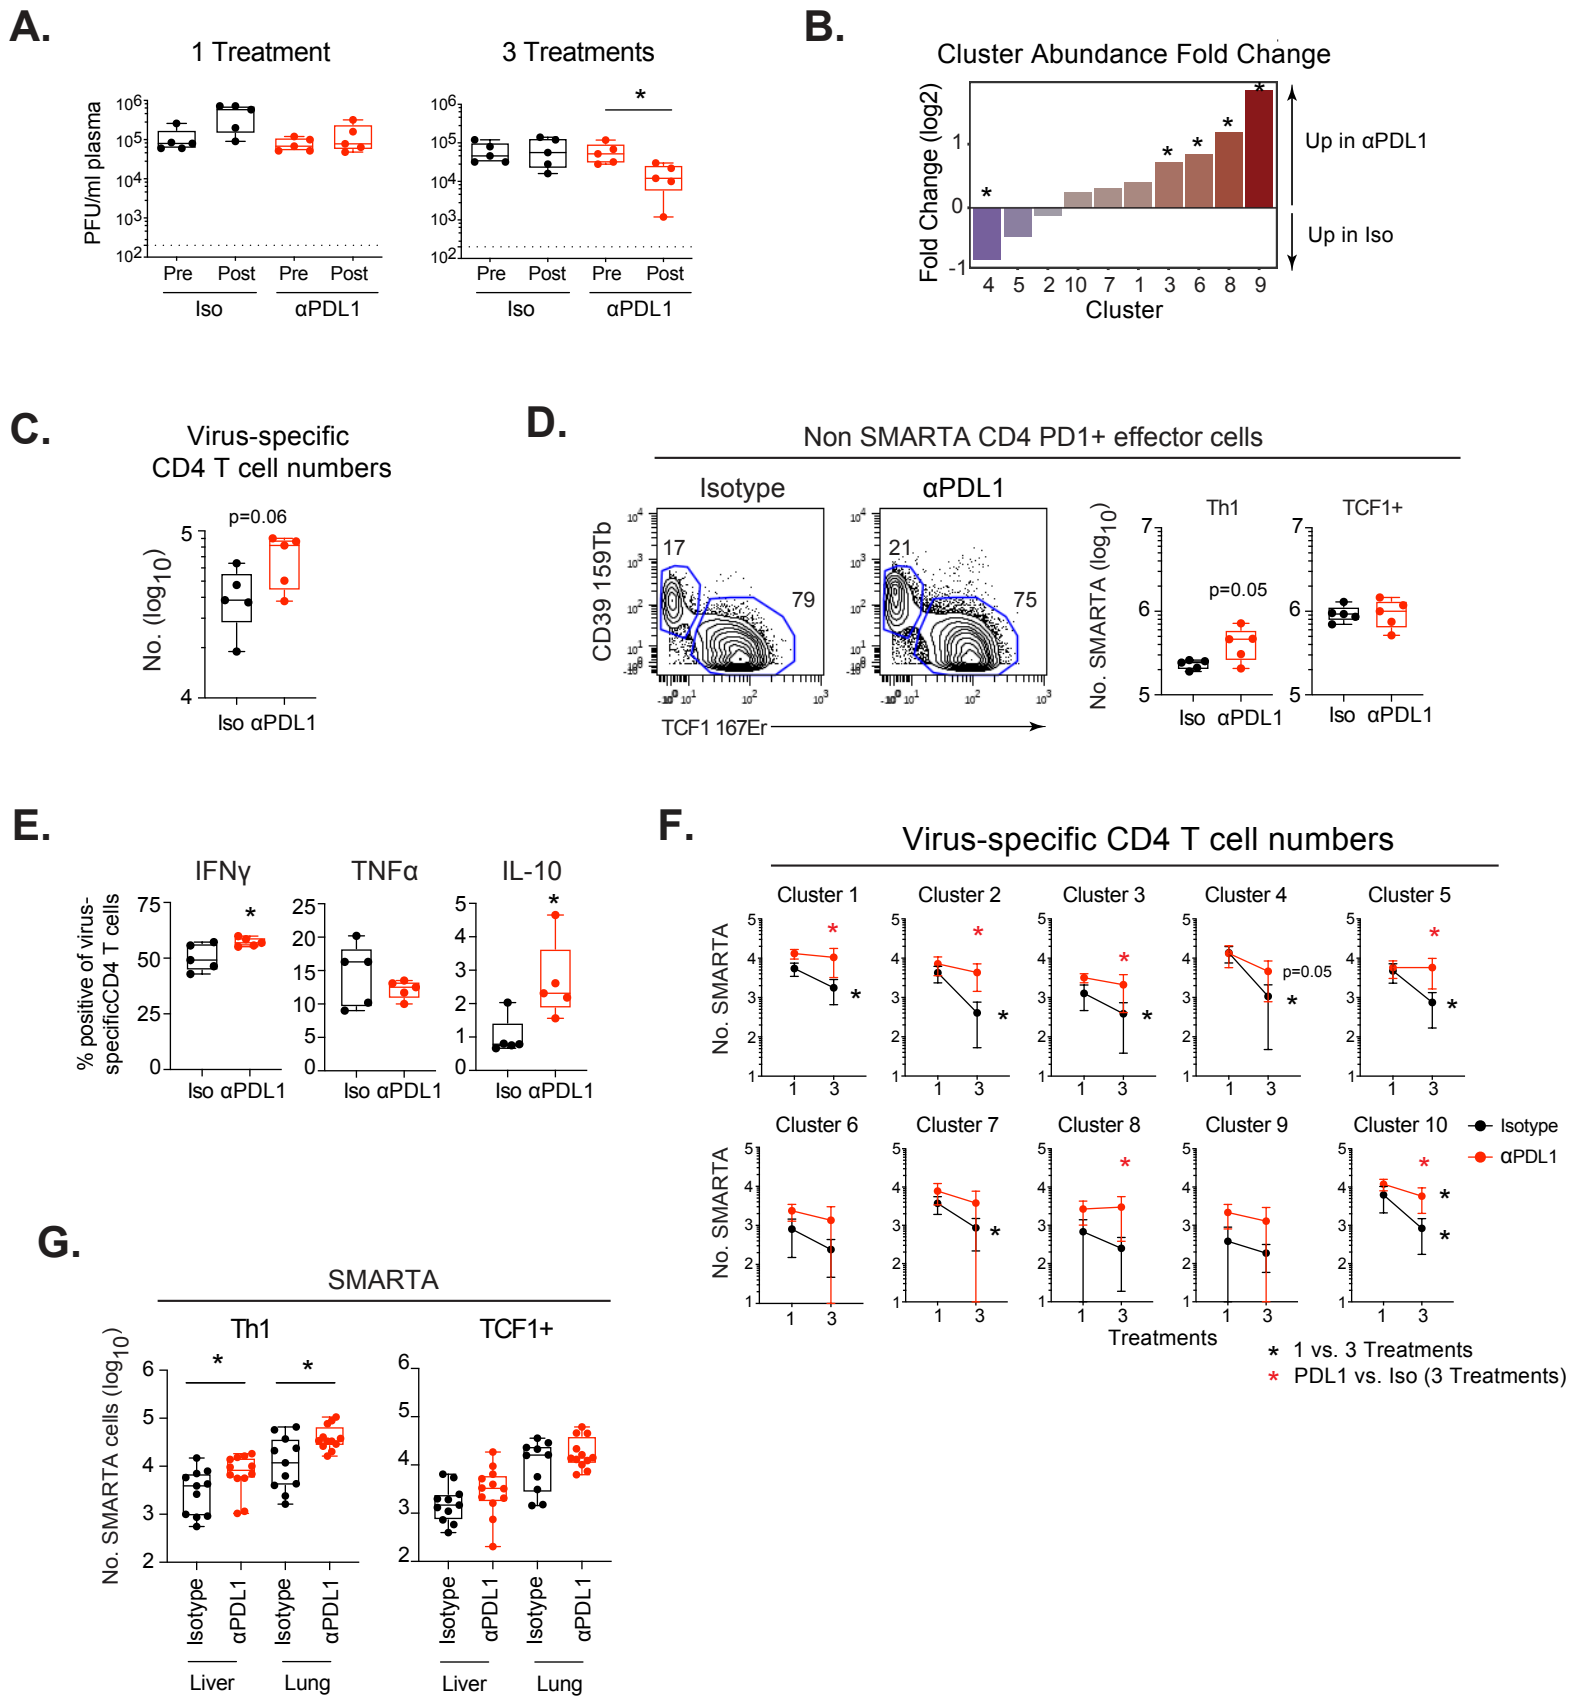

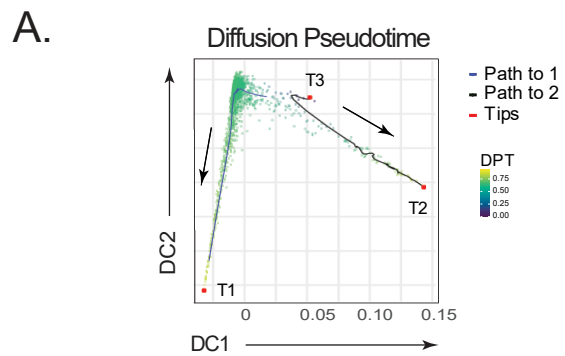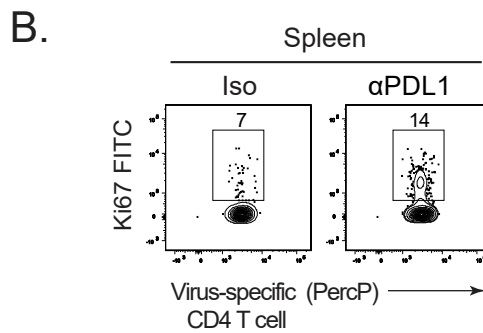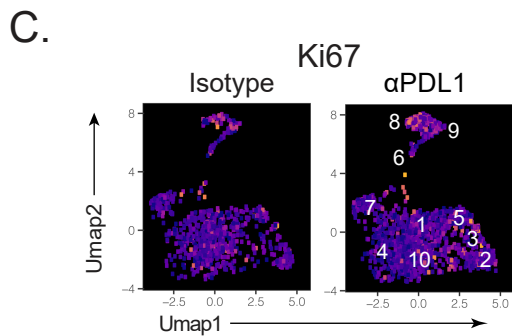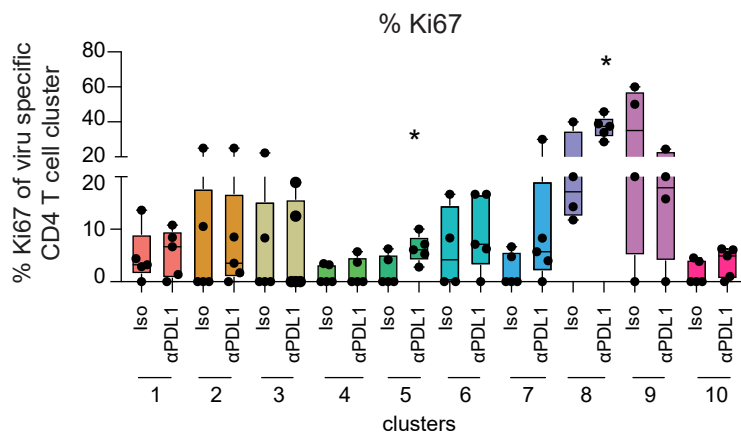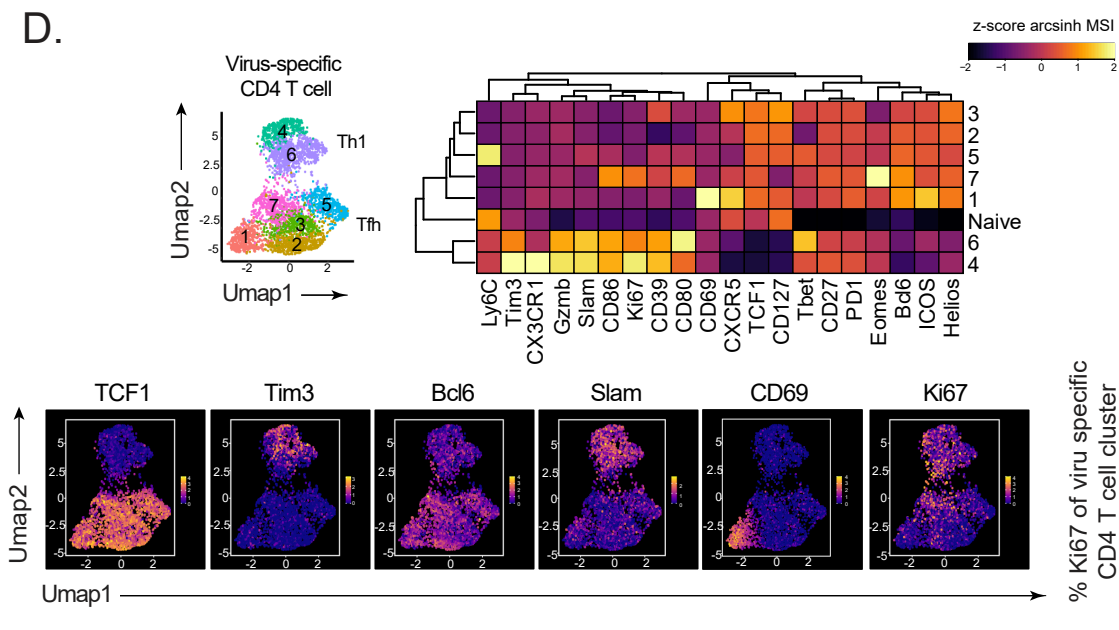

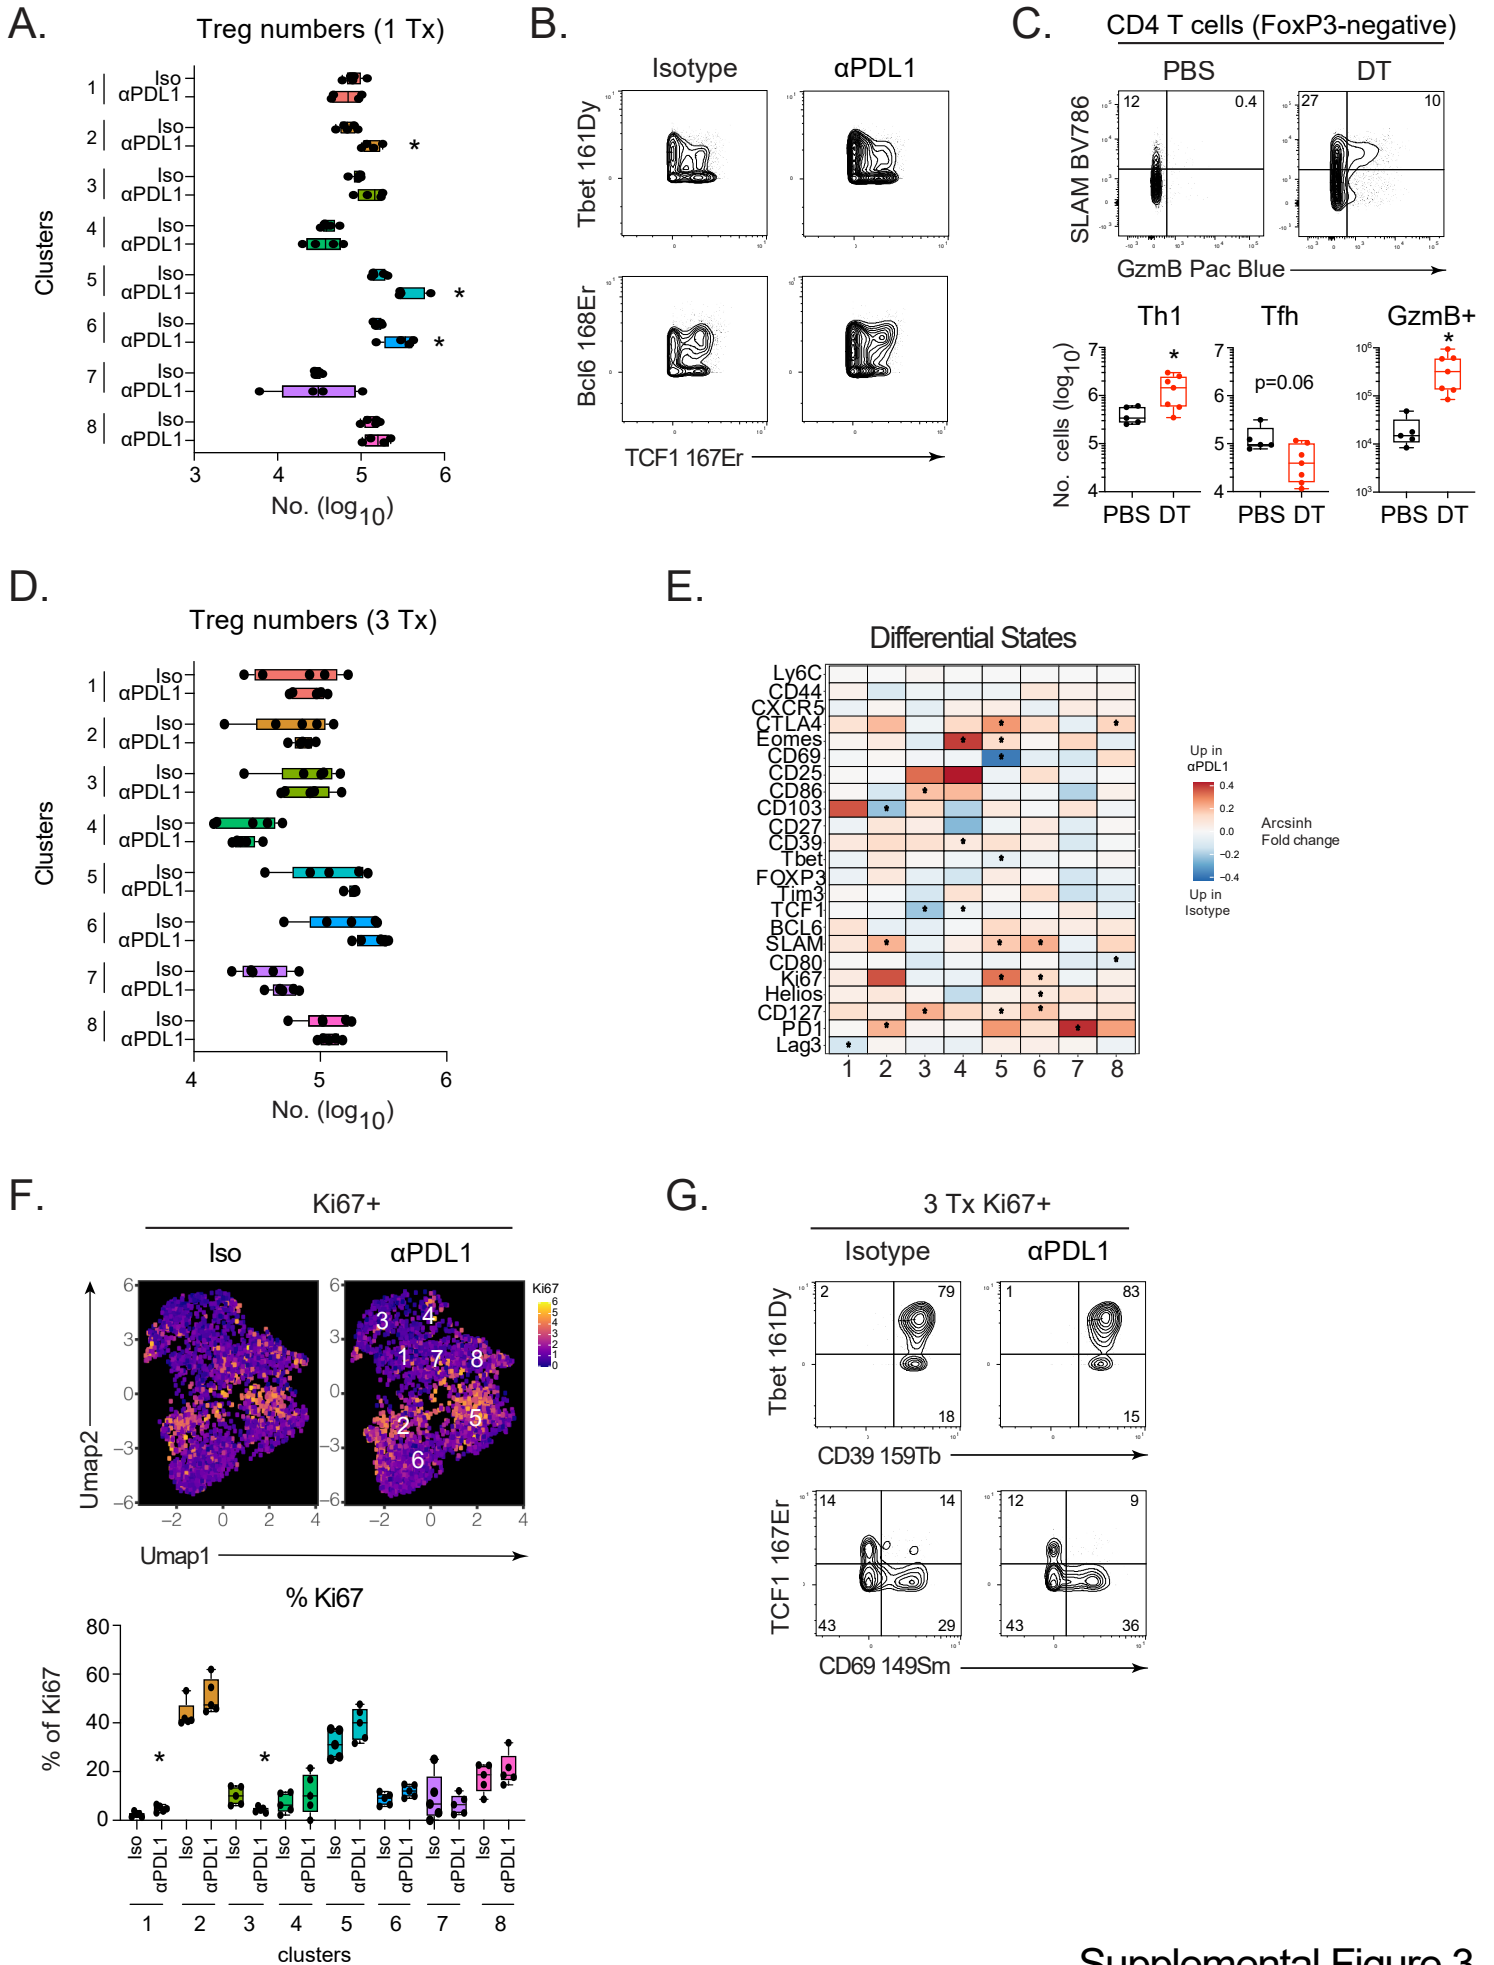

**A.**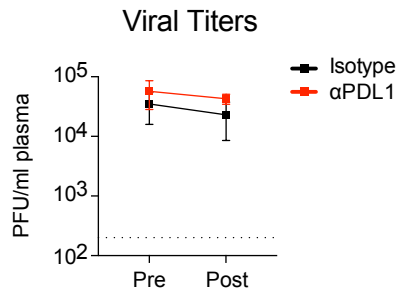**B.**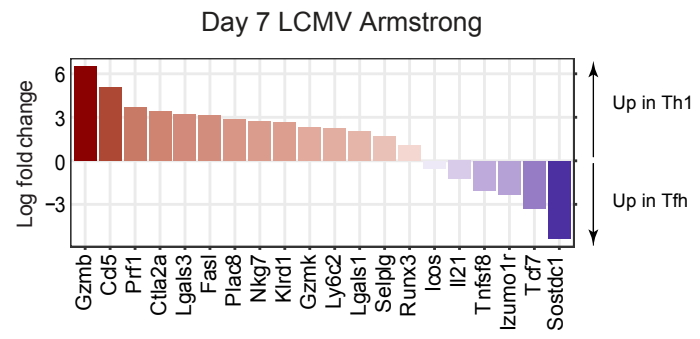**C.**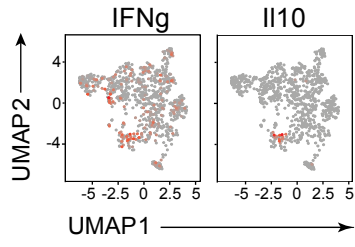

**A.**

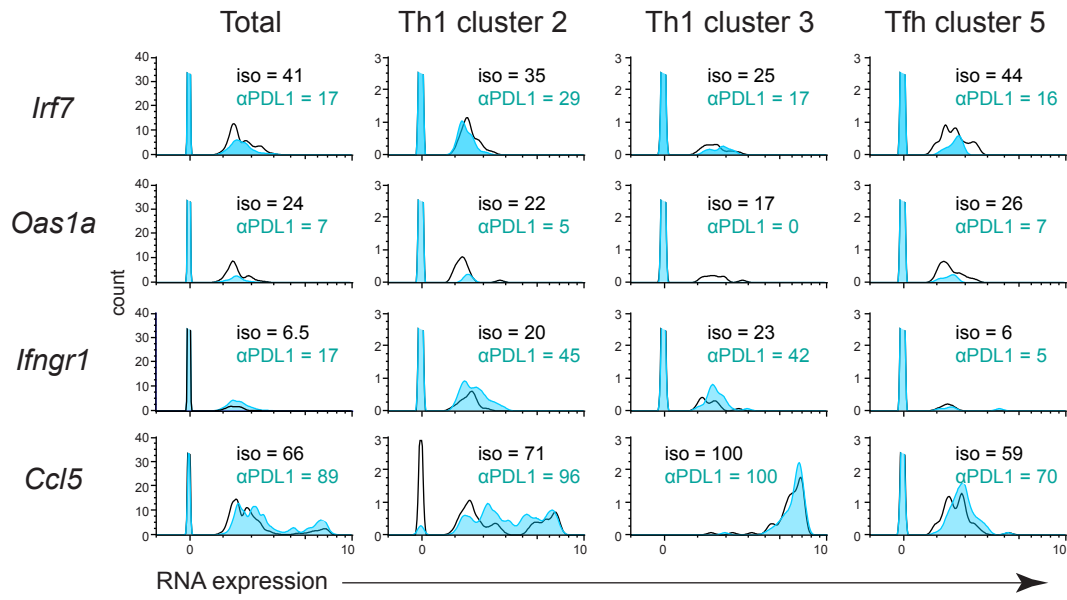

**B.**

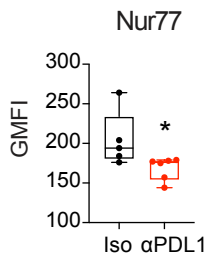

**C.**

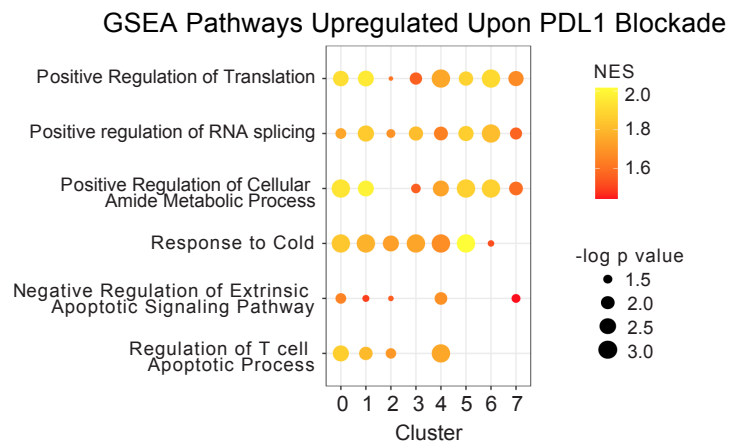

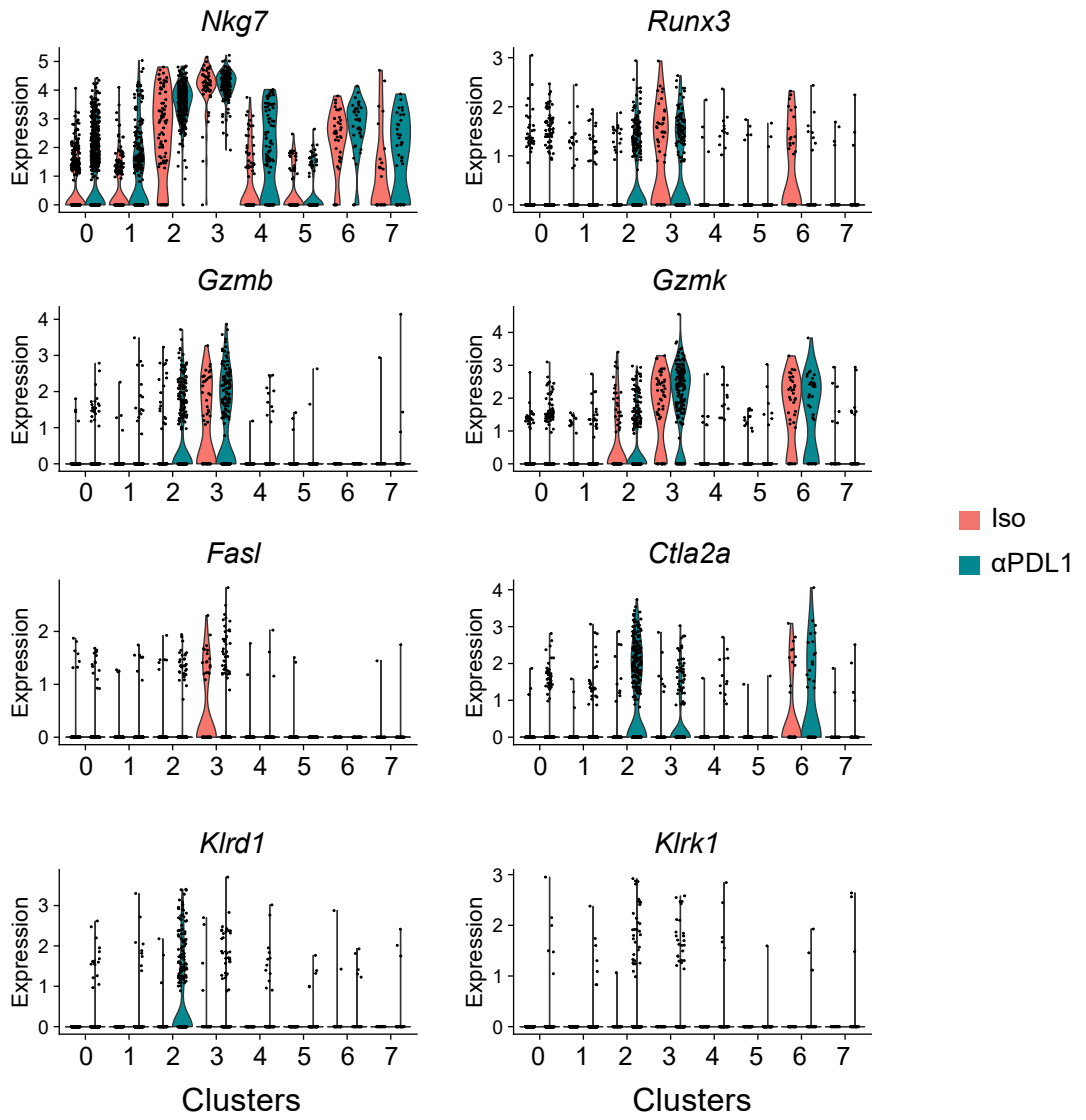

Supplement: NIHMS1895402-supplement-Supplementary_Material.pdf [file NIHMS1895402-supplement-Supplementary_Material.pdf]
